# Supplementary material for: Which fraction of stone wool fibre surface remains uncoated by binder? A detailed analysis by time-of-flight secondary ion mass spectrometry and X-ray photoelectron spectroscopy
Source: Royal Society of Chemistry journal article supplement (doi:10.1039/d1ra06251d), 2021-01-01
Supplement: d1ra06251d1.pdf [file d1ra06251d1.pdf]

## Supporting Information

Table SI1: Fit parameter for the Carbon 1s and Nitrogen 1s Spectra used in CasaXPS

|          | Name          | Position [eV] | Pos Constr. | FWHM Constr. [eV] |
|----------|---------------|---------------|-------------|-------------------|
| <b>A</b> | CH, CC        | 285.0         | ±0.1 eV     | 1.4 , 1.6         |
| <b>B</b> | C-O-C/C-N     | 286.1         | A + 1.1 eV  | A * 1             |
| <b>C</b> | C=O, N-C=O    | 287.4         | A + 2.4 eV  | A * 1             |
| <b>D</b> | COOR/Urea     | 289.2         | A + 4.1 eV  | A * 1             |
| <b>E</b> | CO3           | 290.5         | A + 5.5 eV  | A * 1             |
| <b>F</b> | Urea/Amine    | 400.0         | ±0.1 eV     | 1.3 , 1.5         |
| <b>G</b> | Ammonium      | 401.0         | F+1.0 eV    | F*1               |
| <b>H</b> | Pyrrol-like N | 398.6         | F-1.33 eV   | F*1               |

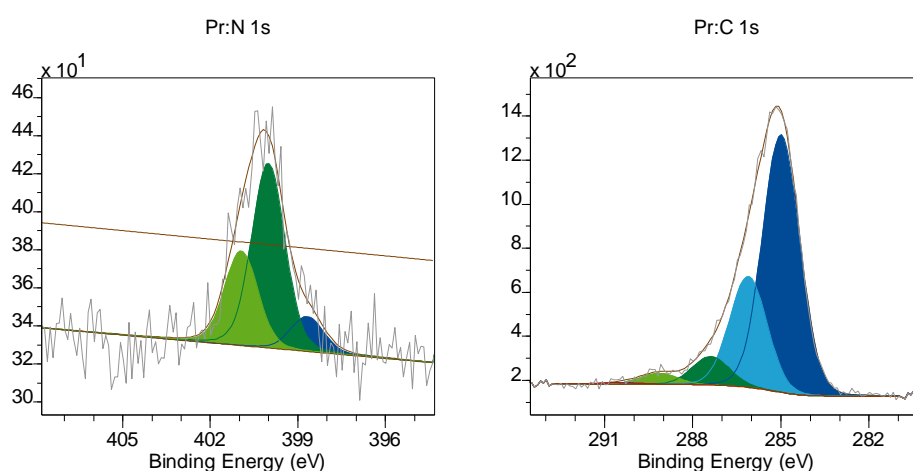

FigureSI 1: Example Fit of DK1 showing the components used to fit the N1s (left pane) and C 1s (right pane) detail spectra of the MMVF under investigation.

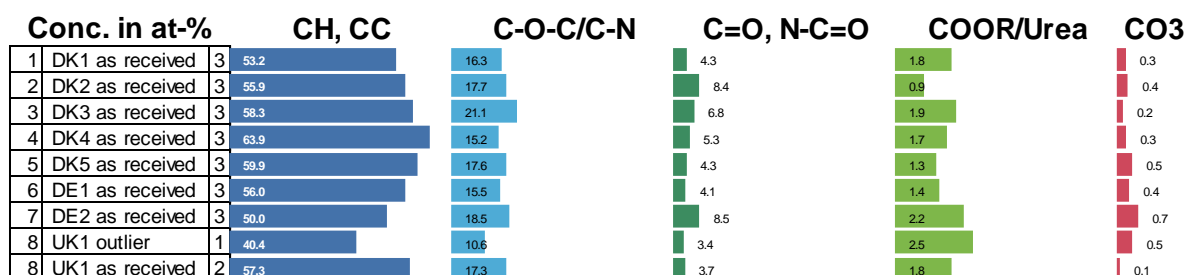

FigureSI 2: Quantification Results of the C1s-Detail Spectra in atom-% based on the fits shown in Figure SI1. COOR/Urea and CO3 are scaled by a factor of 10 for better visibility.

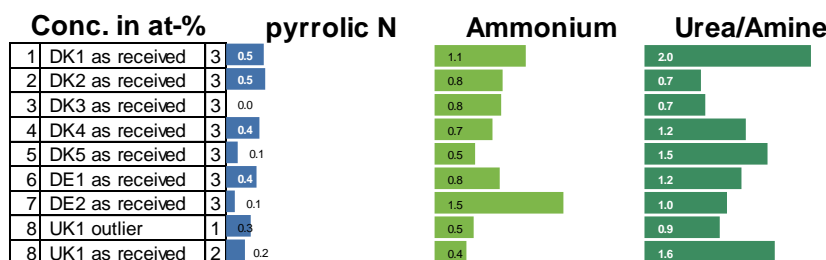

FigureSI 3: Quantification Results of the N 1s-Detail Spectra in atom-% based on the fits shown in Figure SI 1.

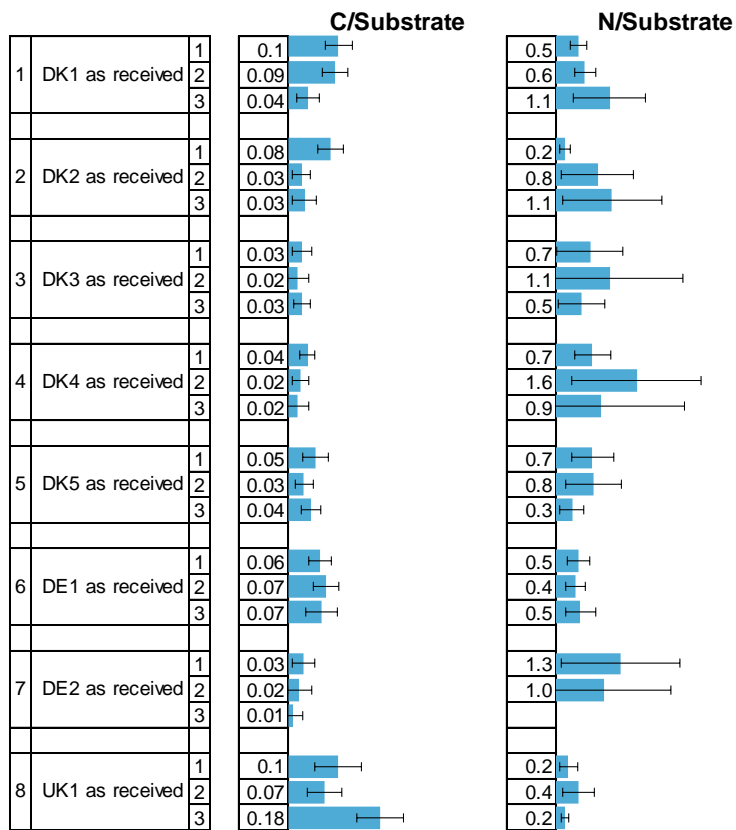

FigureSI 4: Elemental Ratios (at-%/at-%) as measured by XPS for each individual measurement position on all samples of the overlayer-Elements Carbon and Nitrogen to the sum of the Substrate Elements (Si, Ca,Al, S, Mg, K, Fe) Right: Correlation of the overlayer thickness and the C/Substrate ratio.
